# Supplementary material for: Synthesis, crystal structure and photocatalytic properties of an unprecedented arsenic-disubstituted Lindqvist-type peroxopolyoxoniobate ion: {As2Nb4(O2)4O14H1.5}4.5−
Source: Royal Society of Chemistry journal article supplement (doi:10.1039/c4dt00875h), 2014-01-01

## checkCIF/PLATON report

You have not supplied any structure factors. As a result the full set of tests cannot be run.

THIS REPORT IS FOR GUIDANCE ONLY. IF USED AS PART OF A REVIEW PROCEDURE FOR PUBLICATION, IT SHOULD NOT REPLACE THE EXPERTISE OF AN EXPERIENCED CRYSTALLOGRAPHIC REFEREE.

No syntax errors found.      CIF dictionary      Interpreting this report

### Datablock: njy1

---

Bond precision:    O- O = 0.0120 Å      Wavelength=0.71073

Cell:                    a=17.680(5)      b=13.346(4)      c=26.399(8)  
                          alpha=90      beta=90      gamma=90  
Temperature:      296 K

|                | Calculated                                      | Reported                |
|----------------|-------------------------------------------------|-------------------------|
| Volume         | 6229(3)                                         | 6229(3)                 |
| Space group    | P n m a                                         | Pnma                    |
| Hall group     | -P 2ac 2n                                       | ?                       |
| Moiety formula | As8 Cs2 Nb16 O88, 2(Cs O4), 36(O), 6(Cs), 8(Na) | ?                       |
| Sum formula    | As8 Cs10 Na8 Nb16 O132                          | As4 Cs5 H25 Na4 Nb8 O66 |
| Mr             | 5710.94                                         | 2880.67                 |
| Dx,g cm-3      | 3.045                                           | 3.072                   |
| Z              | 2                                               | 4                       |
| Mu (mm-1)      | 6.565                                           | 6.566                   |
| F000           | 5228.0                                          | 5328.0                  |
| F000'          | 5157.31                                         |                         |
| h,k,lmax       | 21,15,31                                        | 21,15,31                |
| Nref           | 5742                                            | 5707                    |
| Tmin,Tmax      | 0.373,0.455                                     | 0.420,0.506             |
| Tmin'          | 0.336                                           |                         |

Correction method= MULTI-SCAN

Data completeness= 0.994      Theta(max)= 25.000

R(reflections)= 0.0513( 4647)      wR2(reflections)= 0.1740( 5707)

S = 1.073      Npar= Npar = 457

---

The following ALERTS were generated. Each ALERT has the format

**test-name\_ALERT\_alert-type\_alert-level.**

Click on the hyperlinks for more details of the test.

---

### Alert level B

|                   |                                          |       |      |       |
|-------------------|------------------------------------------|-------|------|-------|
| PLAT306_ALERT_2_B | Isolated Oxygen Atom (H-atoms Missing ?) | ..... | 01W  | Check |
| PLAT306_ALERT_2_B | Isolated Oxygen Atom (H-atoms Missing ?) | ..... | 02W  | Check |
| PLAT306_ALERT_2_B | Isolated Oxygen Atom (H-atoms Missing ?) | ..... | 03W  | Check |
| PLAT306_ALERT_2_B | Isolated Oxygen Atom (H-atoms Missing ?) | ..... | 04W  | Check |
| PLAT306_ALERT_2_B | Isolated Oxygen Atom (H-atoms Missing ?) | ..... | 05W  | Check |
| PLAT306_ALERT_2_B | Isolated Oxygen Atom (H-atoms Missing ?) | ..... | 06W  | Check |
| PLAT306_ALERT_2_B | Isolated Oxygen Atom (H-atoms Missing ?) | ..... | 07W  | Check |
| PLAT306_ALERT_2_B | Isolated Oxygen Atom (H-atoms Missing ?) | ..... | 08W  | Check |
| PLAT306_ALERT_2_B | Isolated Oxygen Atom (H-atoms Missing ?) | ..... | 09W  | Check |
| PLAT306_ALERT_2_B | Isolated Oxygen Atom (H-atoms Missing ?) | ..... | 010W | Check |

---

### Alert level C

|                   |                                                  |                |        |       |
|-------------------|--------------------------------------------------|----------------|--------|-------|
| PLAT041_ALERT_1_C | Calc. and Reported SumFormula                    | Strings Differ | Please | Check |
| PLAT043_ALERT_1_C | Calculated and Reported Mol. Weight              | Differ by ..   | 50.40  | Check |
| PLAT068_ALERT_1_C | Reported F000 Differs from Calcd (or Missing)... |                | Please | Check |

---

### Alert level G

FORMU01\_ALERT\_2\_G There is a discrepancy between the atom counts in the  
\_chemical\_formula\_sum and the formula from the \_atom\_site\* data.  
Atom count from \_chemical\_formula\_sum: H25 As4 Cs5 Na4 Nb8 O66  
Atom count from the \_atom\_site data: As4 Cs5 Na4 Nb8 O66

CELLZ01\_ALERT\_1\_G Difference between formula and atom\_site contents detected.

CELLZ01\_ALERT\_1\_G WARNING: H atoms missing from atom sitelist. Is this intentional?

From the CIF: \_cell\_formula\_units\_Z 4  
From the CIF: \_chemical\_formula\_sum As4 Cs5 H25 Na4 Nb8 O66  
TEST: Compare cell contents of formula and atom\_site data

| atom | Z*formula | cif sites | diff   |
|------|-----------|-----------|--------|
| As   | 16.00     | 16.00     | 0.00   |
| Cs   | 20.00     | 20.00     | 0.00   |
| H    | 100.00    | 0.00      | 100.00 |
| Na   | 16.00     | 16.00     | 0.00   |
| Nb   | 32.00     | 32.00     | 0.00   |
| O    | 264.00    | 264.00    | 0.00   |

PLAT005\_ALERT\_5\_G No \_iucr\_refine\_instructions\_details in the CIF Please Do !

PLAT045\_ALERT\_1\_G Calculated and Reported Z Differ by ..... 0.50 Ratio

PLAT072\_ALERT\_2\_G SHELXL First Parameter in WGHT Unusually Large. 0.11 Why ?

PLAT083\_ALERT\_2\_G SHELXL Second Parameter in WGHT Unusually Large. 56.31 Why ?

PLAT232\_ALERT\_2\_G Hirshfeld Test Diff (M-X) Cs5 -- O1 .. 10.3 su

PLAT232\_ALERT\_2\_G Hirshfeld Test Diff (M-X) Cs5 -- O23\_a .. 13.2 su

PLAT301\_ALERT\_3\_G Main Residue Disorder ..... Percentage = 2 Note

PLAT302\_ALERT\_4\_G Anion/Solvent Disorder ..... Percentage = 12 Note

PLAT790\_ALERT\_4\_G Centre of Gravity not Within Unit Cell: Resd. # 7 Note

O

PLAT790\_ALERT\_4\_G Centre of Gravity not Within Unit Cell: Resd. # 8 Note

O

PLAT790\_ALERT\_4\_G Centre of Gravity not Within Unit Cell: Resd. # 11 Note

O

PLAT790\_ALERT\_4\_G Centre of Gravity not Within Unit Cell: Resd. # 14 Note

Cs

PLAT790\_ALERT\_4\_G Centre of Gravity not Within Unit Cell: Resd. # 15 Note

Cs

PLAT790\_ALERT\_4\_G Centre of Gravity not Within Unit Cell: Resd. # 17 Note

Na

---

0 ALERT level A = Most likely a serious problem - resolve or explain

10 ALERT level B = A potentially serious problem, consider carefully

3 **ALERT level C** = Check. Ensure it is not caused by an omission or oversight  
17 **ALERT level G** = General information/check it is not something unexpected

6 ALERT type 1 CIF construction/syntax error, inconsistent or missing data  
15 ALERT type 2 Indicator that the structure model may be wrong or deficient  
1 ALERT type 3 Indicator that the structure quality may be low  
7 ALERT type 4 Improvement, methodology, query or suggestion  
1 ALERT type 5 Informative message, check

---

It is advisable to attempt to resolve as many as possible of the alerts in all categories. Often the minor alerts point to easily fixed oversights, errors and omissions in your CIF or refinement strategy, so attention to these fine details can be worthwhile. In order to resolve some of the more serious problems it may be necessary to carry out additional measurements or structure refinements. However, the purpose of your study may justify the reported deviations and the more serious of these should normally be commented upon in the discussion or experimental section of a paper or in the "special\_details" fields of the CIF. checkCIF was carefully designed to identify outliers and unusual parameters, but every test has its limitations and alerts that are not important in a particular case may appear. Conversely, the absence of alerts does not guarantee there are no aspects of the results needing attention. It is up to the individual to critically assess their own results and, if necessary, seek expert advice.

### **Publication of your CIF in IUCr journals**

A basic structural check has been run on your CIF. These basic checks will be run on all CIFs submitted for publication in IUCr journals (*Acta Crystallographica*, *Journal of Applied Crystallography*, *Journal of Synchrotron Radiation*); however, if you intend to submit to *Acta Crystallographica Section C* or *E*, you should make sure that full publication checks are run on the final version of your CIF prior to submission.

### **Publication of your CIF in other journals**

Please refer to the *Notes for Authors* of the relevant journal for any special instructions relating to CIF submission.

---

**PLATON version of 05/02/2014; check.def file version of 05/02/2014**

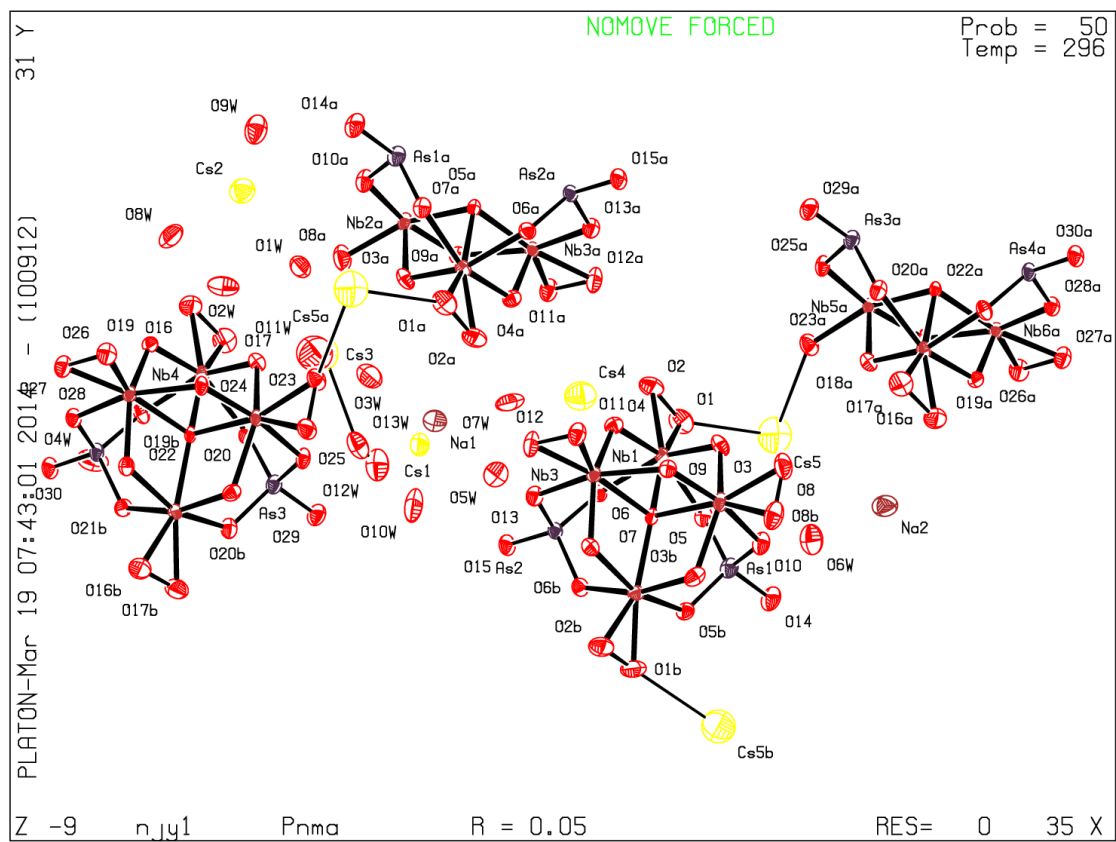

Supplement: c4dt00875h1.pdf [file c4dt00875h1.pdf]
